# Supplementary material
Source: PubMed Central journal article supplement (PMC9536146)
Supplement: NIHMS1829384-supplement-1.pdf [file NIHMS1829384-supplement-1.pdf]

832 Supplementary Material  
833  
834 Figures

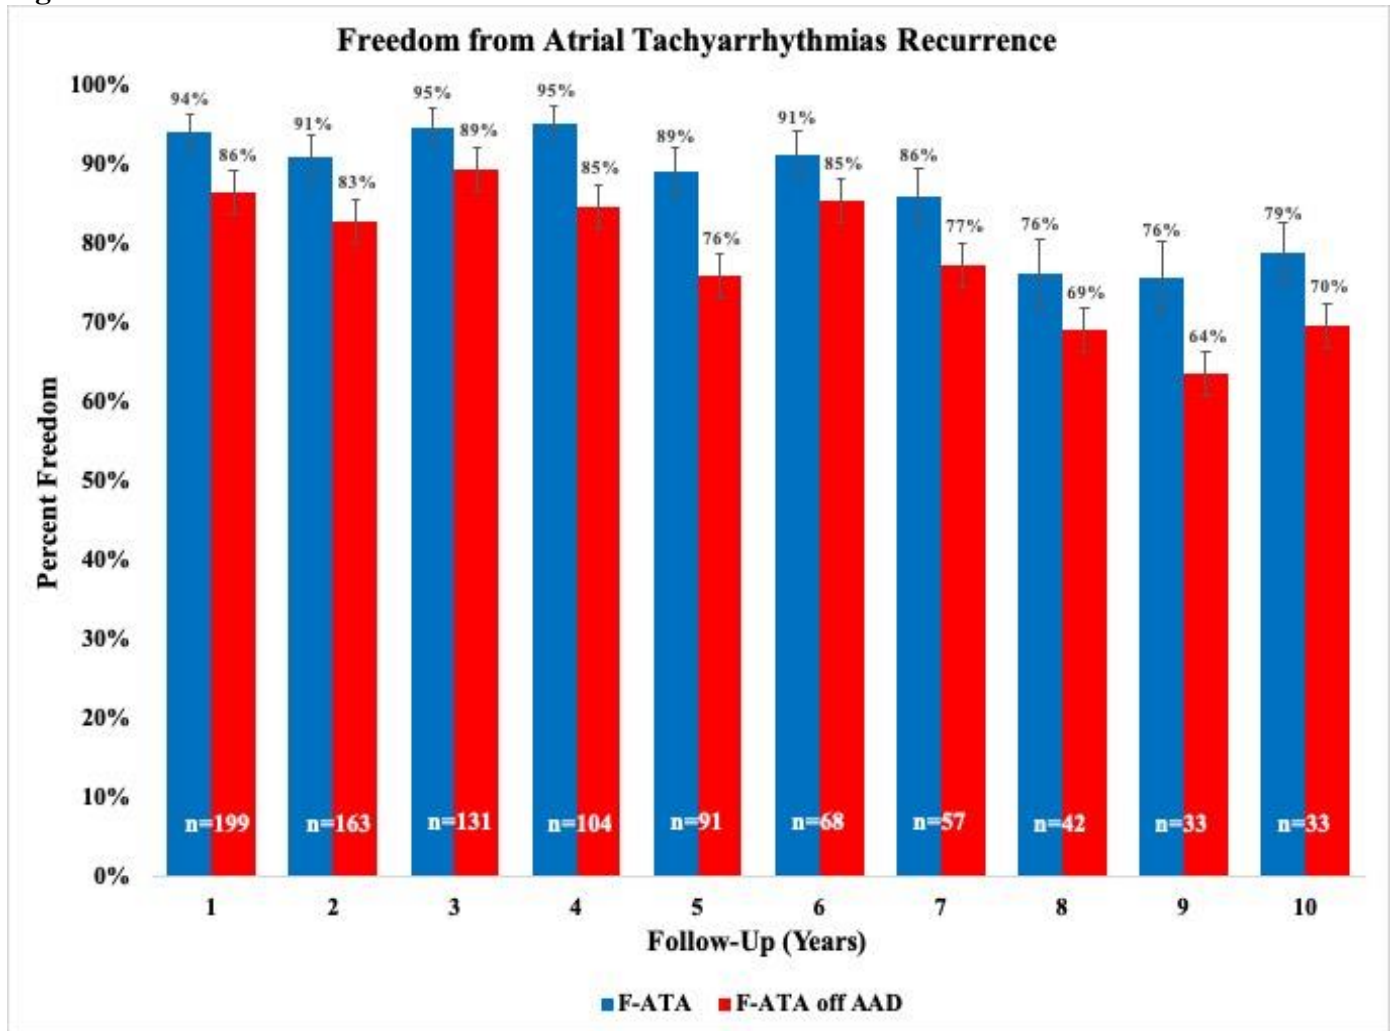

835  
836 **Figure E1.** Complete ten-year follow-up showing freedom from atrial tachyarrhythmia (ATA)  
837 recurrence on and off antiarrhythmic drugs (AAD) with 95% confidence intervals following  
838 stand-alone CMP-IV.

839  
840  
841  
842  
843  
844  
845  
846

847

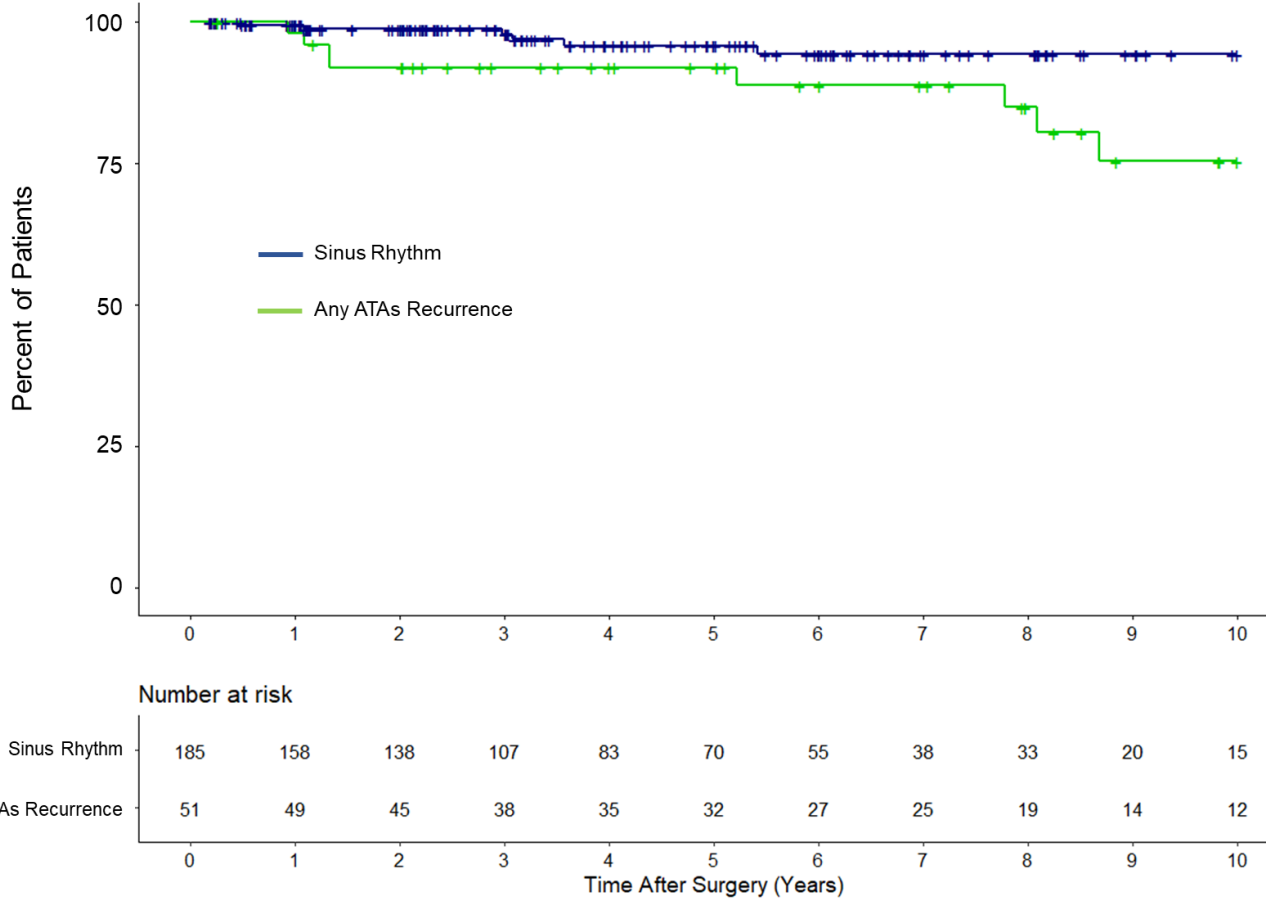

848  
849

850 **Figure E2.** Estimated survival of patients who remained in sinus rhythm (blue) and those who  
851 experienced any atrial tachyarrhythmias (ATAs) recurrence (green) by Kaplan-Meier analysis  
852 (Log-rank test,  $P=0.021$ ).

853  
854  
855  
856  
857  
858  
859  
860  
861  
862  
863  
864  
865

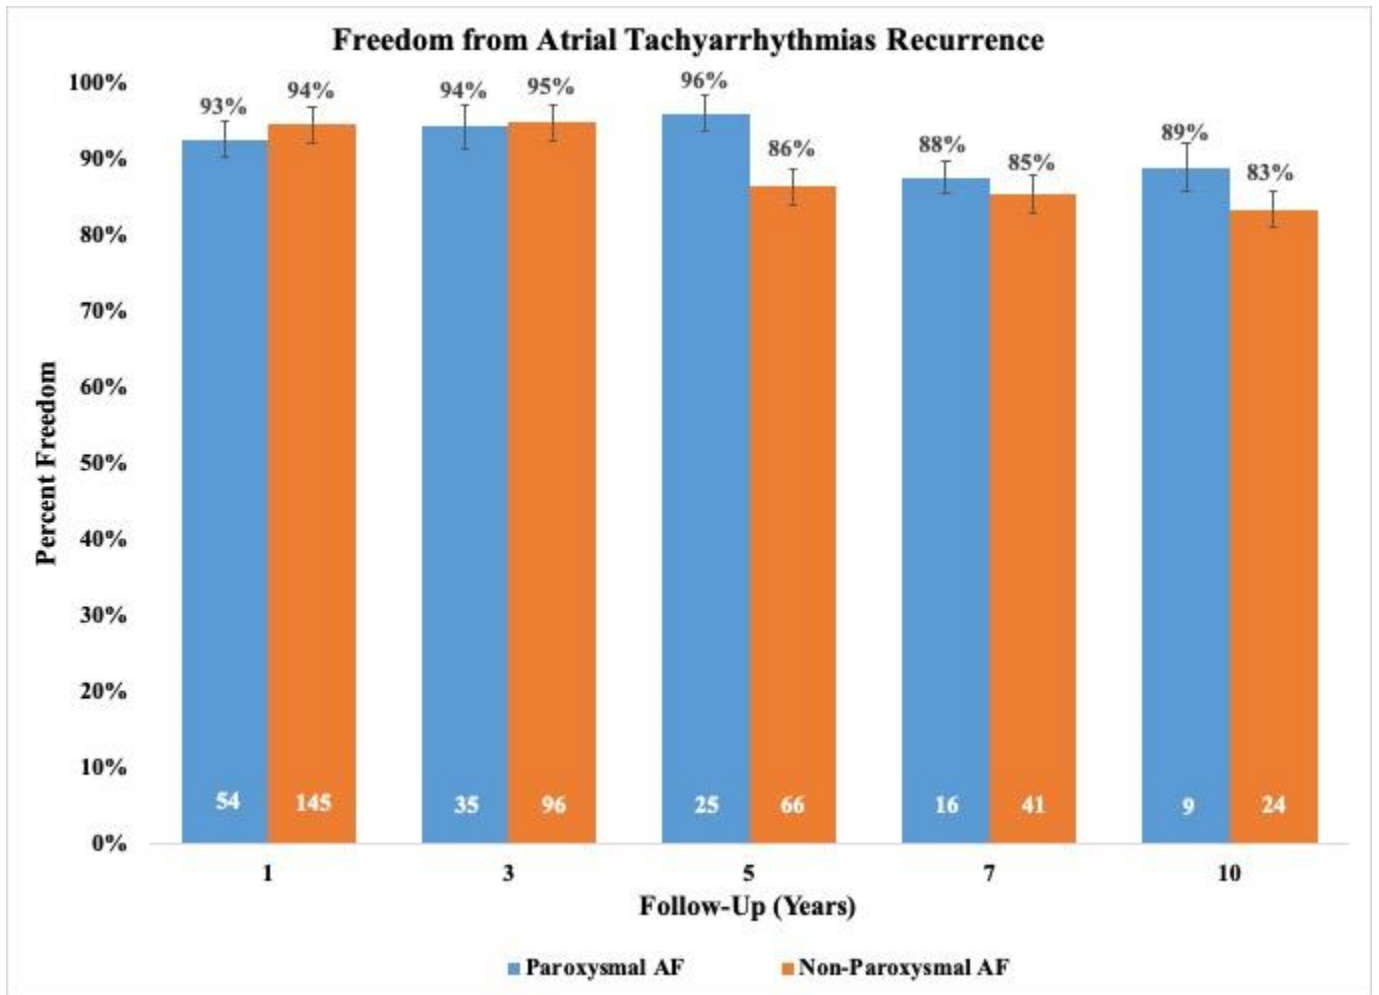

866

867 **Figure E3.** Freedom from atrial tachyarrhythmia (ATA) recurrence on or off antiarrhythmic  
 868 drugs (AAD) with 95% confidence intervals of patients with paroxysmal (blue) vs non-  
 869 paroxysmal AF (orange) following stand-alone CMP-IV.

870

871

872

873

874

875

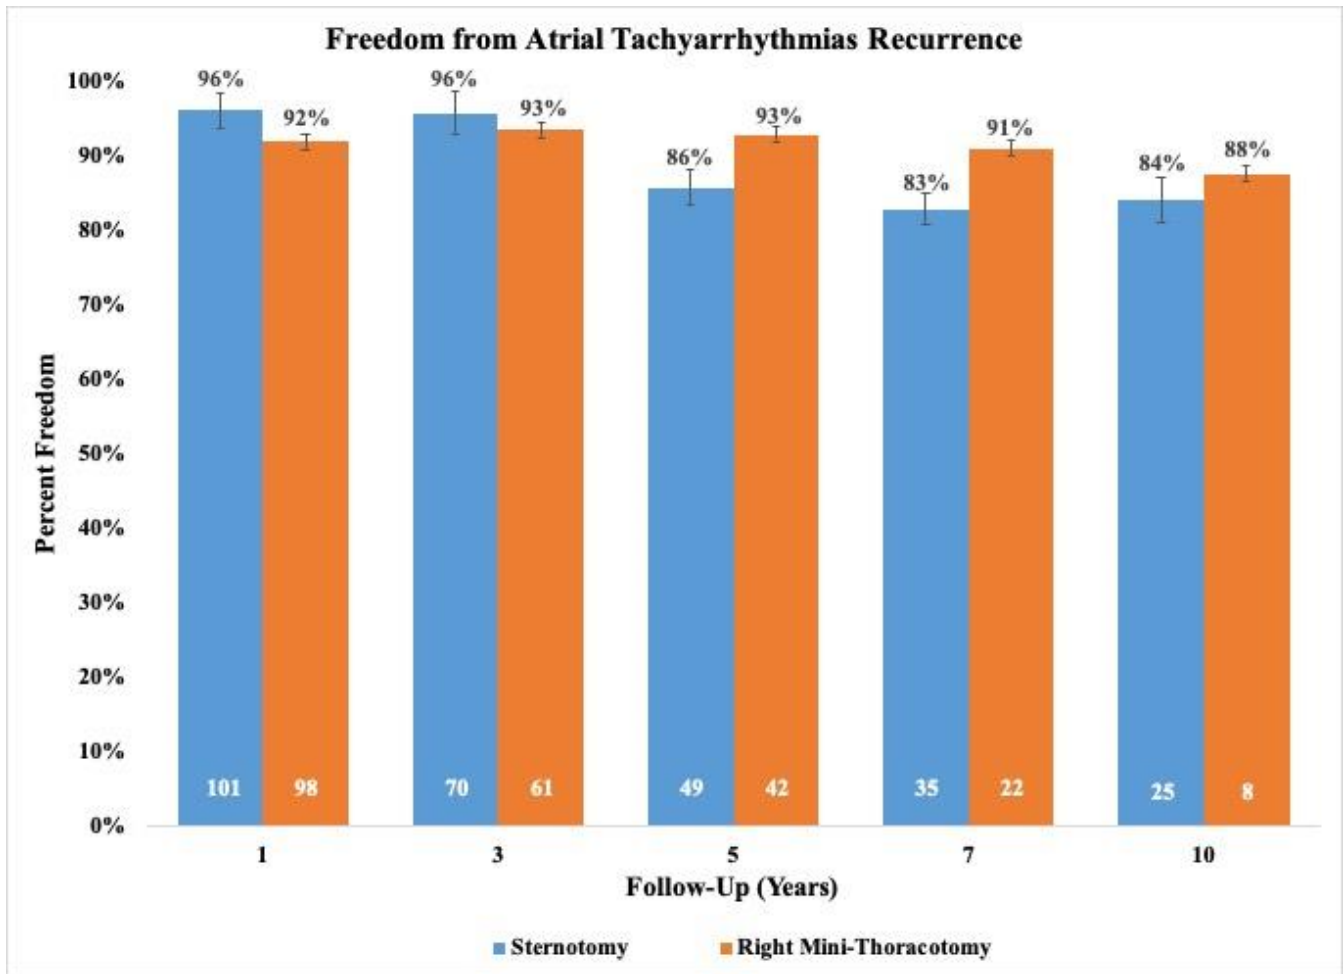

876

877 **Figure E4.** Freedom from atrial tachyarrhythmia (ATA) recurrence on or off antiarrhythmic  
 878 drugs (AAD) with 95% confidence intervals following stand-alone CMP-IV via median  
 879 sternotomy (blue) and right mini-thoracotomy (orange).

880

881

882

883

884

885

886

887

888

889

890

891

892

893  
894  
895  
896  
897  
898  
899  
900  
901  
902

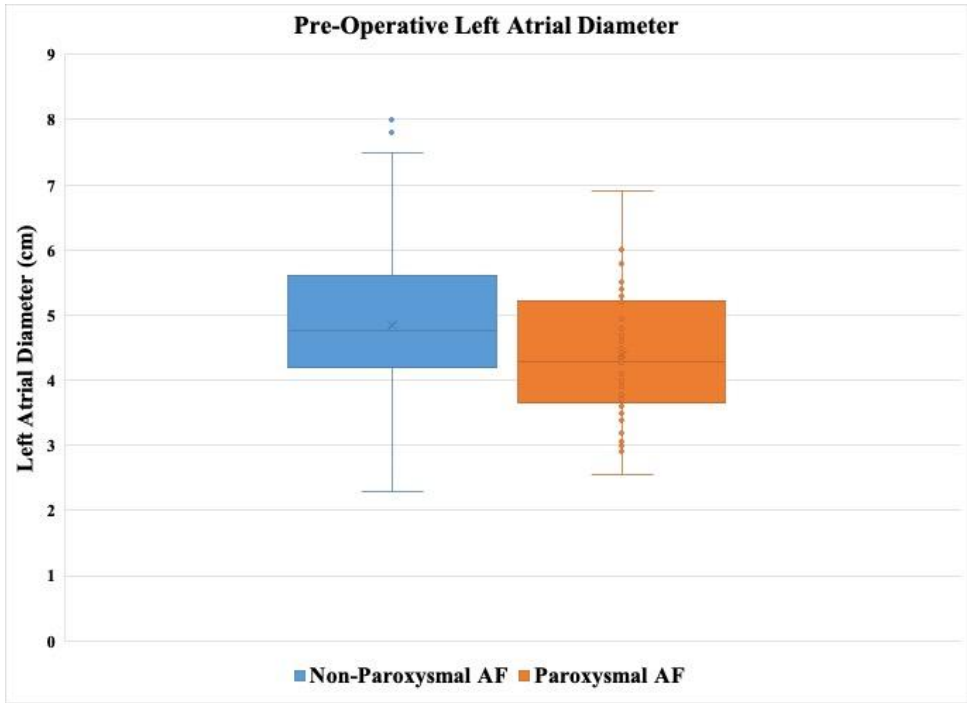

903  
904  
905  
906  
907  
908  
909  
910  
911  
912

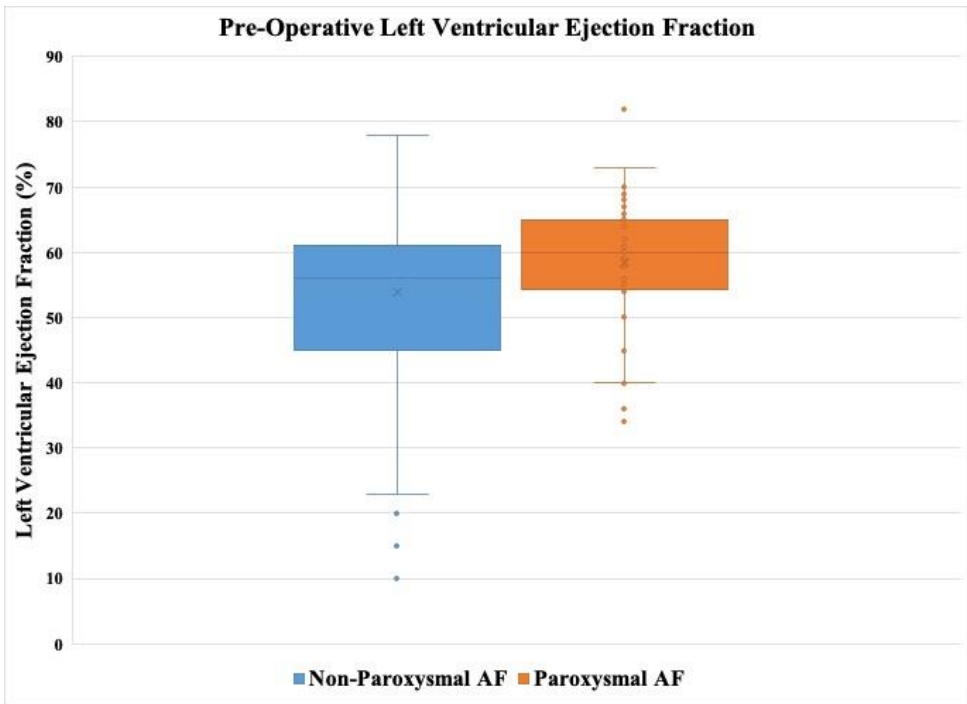

913 **Figure E5.** Box and Whisker plots showing greater proportion of patients with larger left atrial  
914 diameters ( $P=0.004$ ) and lower left ventricular ejection fractions ( $P=0.018$ ) in patients with non-  
915 paroxysmal AF vs paroxysmal AF.

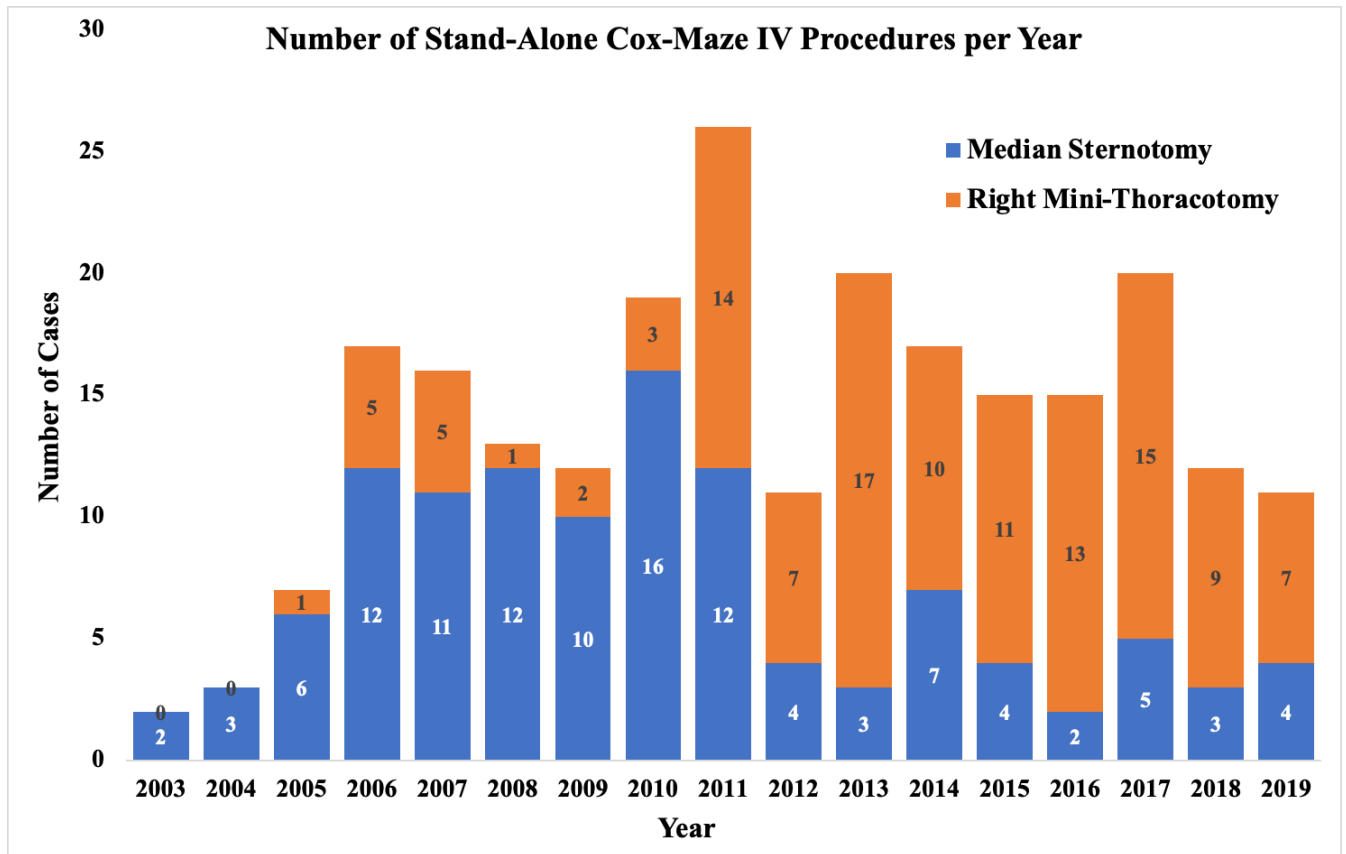

916

917 **Figure E6.** Number of stand-alone Cox-Maze IV procedures performed per year over the course  
 918 of the study period from 2003 to 2019. Number of cases performed by median sternotomy (blue)  
 919 and right mini-thoracotomy (orange) are also included.

920

921

922

923

924

925

926

927

928 Tables

929

930 Table E1. Late Follow-Up following Stand-Alone CMP-IV

| Variable                            | Paroxysmal AF (n = 60) | Non-Paroxysmal AF (n = 176) | P value |
|-------------------------------------|------------------------|-----------------------------|---------|
| Follow-up (years), mean ± std       | 5.0 ± 3.1              | 4.5 ± 3.2                   | 0.255   |
| <b>1 Year Follow-Up</b>             |                        |                             |         |
| Variable                            | Paroxysmal AF (n = 54) | Non-Paroxysmal AF (n = 145) | P value |
| Late Stroke (> 30 days), n (%)      | 0 (0.0)                | 0 (0.0)                     | 1.000   |
| Freedom from Coumadin, n (%)        | 39 (72.2)              | 108 (74.4)                  | 0.747   |
| Additional Catheter Ablation, n (%) | 0 (0.0)                | 0 (0.0)                     | 1.000   |
| <b>5 Year Follow-Up</b>             |                        |                             |         |
| Variable                            | Paroxysmal AF (n = 25) | Non-Paroxysmal AF (n = 66)  | P value |
| Late Stroke (> 30 days), n (%)      | 0 (0.0)                | 0 (0.0)                     | 1.000   |
| Freedom from Coumadin, n (%)        | 19 (76.0)              | 43 (65.2)                   | 0.322   |
| Additional Catheter Ablation, n (%) | 1 (4.0)                | 0 (0.0)                     | 0.984   |
| <b>10 Year Follow-Up</b>            |                        |                             |         |
| Variable                            | Paroxysmal AF (n = 9)  | Non-Paroxysmal AF (n = 24)  | P value |
| Late Stroke (> 30 days), n (%)      | 0 (0.0)                | 0 (0.0)                     | 1.000   |
| Freedom from Coumadin, n (%)        | 6 (66.7)               | 21 (87.5)                   | 0.167   |
| Additional Catheter Ablation, n (%) | 0 (0.0)                | 3 (12.5)                    | 0.849   |

931 AF = atrial fibrillation; STD = standard deviation

932

933

934

935

936

937

938

939

940

941

942

943

944

945

946

947

948

949 **Table E2. Univariable and Multivariable Factors Associated with First ATAs Recurrence**  
 950 **up to 10 Years after Stand-Alone CMP-IV (Fine-Gray Regression)**  
 951

| Variable                     | Univariable Analysis |                                       | Multivariable Analysis |                                       |
|------------------------------|----------------------|---------------------------------------|------------------------|---------------------------------------|
|                              | P-Value              | Subdistribution Hazard Ratio (95% CI) | P-Value                | Subdistribution Hazard Ratio (95% CI) |
| Age (years)                  | 0.279                | 1.02 (0.99, 1.05)                     | 0.205                  | 1.03 (0.99, 1.07)                     |
| Gender                       | 0.761                | 0.92 (0.53, 1.59)                     | 0.859                  | 0.95 (0.52, 1.72)                     |
| BMI (kg/m <sup>2</sup> )     | 0.325                | 1.02 (0.98, 1.06)                     | 0.336                  | 1.03 (0.98, 1.08)                     |
| Dyslipidemia                 | 0.231                | 1.41 (0.81, 2.46)                     | 0.772                  | 1.09 (0.60, 1.97)                     |
| Hypertension                 | 0.307                | 1.37 (0.75, 2.51)                     | 0.553                  | 1.24 (0.64, 2.39)                     |
| NYHA (Class III or IV)       | 0.165                | 1.47 (0.85, 2.55)                     | 0.341                  | 1.33 (0.74, 2.37)                     |
| LVEF (%)                     | 0.997                | 1.00 (0.98, 1.02)                     | 0.990                  | 1.00 (0.98, 1.02)                     |
| Smoker                       | 0.241                | 1.40 (0.80, 2.47)                     | 0.111                  | 1.58 (0.90, 2.77)                     |
| Non-Paroxysmal AF            | 0.359                | 0.74 (0.38, 1.42)                     | 0.810                  | 0.92 (0.44, 1.89)                     |
| Pre-operative Creatinine     | 0.872                | 1.10 (0.34, 3.61)                     | 0.922                  | 1.07 (0.26, 4.42)                     |
| LA Size (cm)                 | <b>0.039</b>         | <b>1.30 (1.01, 1.66)</b>              | <b>0.040</b>           | <b>1.33 (1.01, 1.76)</b>              |
| Number of Catheter Ablations | <b>0.009</b>         | <b>1.29 (1.07, 1.55)</b>              | <b>&lt;0.001</b>       | <b>1.44 (1.18, 1.76)</b>              |
| Perfusion Time (min)         | 0.294                | 1.00 (1.00, 1.01)                     | 0.406                  | 1.01 (0.99, 1.02)                     |
| Sternotomy                   | 0.669                | 0.89 (0.51, 1.55)                     | 0.788                  | 0.89 (0.35, 2.03)                     |
| Era                          | 0.731                | 1.11 (0.60, 2.06)                     | 0.419                  | 0.75 (0.37, 1.52)                     |

952 AF = atrial fibrillation; BMI = body mass index; CI = confidence interval; LA = left atrial; LVEF  
 953 = left ventricular ejection fraction; NYHA = New York Heart Association

954  
 955  
 956  
 957  
 958  
 959  
 960  
 961  
 962  
 963  
 964  
 965  
 966  
 967  
 968  
 969  
 970  
 971  
 972  
 973  
 974  
 975



976 **Table E3. Perioperative Outcomes of Patients Who Received Sternotomy vs**  
 977 **Right Mini-thoracotomy**

| <b>Variable</b>                              | <b>Sternotomy<br/>(n = 116)</b> | <b>Right Mini-<br/>Thoracotomy<br/>(n = 120)</b> | <b>P value</b>   |
|----------------------------------------------|---------------------------------|--------------------------------------------------|------------------|
| Hospital length of stay (days), median [IQR] | 10.0 [8.0,12.0]                 | 9.0 [8.0,11.0]                                   | 0.162            |
| ICU length of stay (hours), median [IQR]     | 51.5 [26.1,97.5]                | 44.5 [24.0,75.9]                                 | 0.317            |
| CPB time (min), mean ± std                   | 124.3 ± 28.3                    | 168.4 ± 26.8                                     | <b>&lt;0.001</b> |
| Cross-clamp time (min), mean ± std           | 41.0 ± 14.9                     | 66.9 ± 15.1                                      | <b>&lt;0.001</b> |
| Post-operative creatinine, mean ± std        | 1.59 ± 0.90                     | 1.31 ± 0.47                                      | <b>0.005</b>     |
| Overall major complications, n (%)           | 7 (6.0)                         | 6 (5.0)                                          | 0.782            |
| Cerebrovascular accident, n (%)              | 2 (1.7)                         | 1 (0.8)                                          |                  |
| Pneumonia, n (%)                             | 3 (2.6)                         | 3 (2.5)                                          |                  |
| Mediastinitis, n (%)                         | 1 (0.9)                         | 0 (0.0)                                          |                  |
| Renal failure requiring dialysis, n (%)      | 1 (0.9)                         | 1 (0.8)                                          |                  |
| Intra-aortic balloon pump, n (%)             | 1 (0.9)                         | 0 (0.0)                                          |                  |
| Reoperation for bleeding, n (%)              | 0 (0.0)                         | 1 (0.8)                                          |                  |
| Post op PM, n (%)                            | 8 (6.9)                         | 7 (5.8)                                          | 0.794            |
| 30 Day Mortality, n (%)                      | 0 (0.0)                         | 0 (0.0)                                          | 1.000            |

978 Overall major complication rate includes pneumonia, cerebrovascular accident, mediastinitis,  
 979 intra-aortic balloon pump, renal failure requiring dialysis, reoperation for bleeding. CPB =  
 980 cardiopulmonary bypass; ICU = intensive care unit; IQR = interquartile range; PM = pacemaker;  
 981 STD = standard deviation

982  
983  
984  
985  
986  
987  
988  
989  
990  
991  
992  
993  
994  
995  
996  
997  
998  
999  
1000  
1001  
1002

1003 **Table E4.** Percentage of patients estimated to be in each state at each year after stand-alone  
 1004 CMP-IV. Patients were assumed to be in one of three distinct states: alive and free from ATAs  
 1005 recurrence (composite endpoint), alive and having experienced first ATAs recurrence (CIF), or  
 1006 dead before ATAs recurrence (CIF).  
 1007

| Year | Number at Risk | Alive and free of ATAs recurrence (composite endpoint) | First Documented ATAs recurrence (CIF) | Death (CIF) |
|------|----------------|--------------------------------------------------------|----------------------------------------|-------------|
| 1    | 187            | 90%                                                    | 10%                                    | 0%          |
| 2    | 160            | 86%                                                    | 13%                                    | 1%          |
| 3    | 124            | 82%                                                    | 16%                                    | 2%          |
| 4    | 99             | 80%                                                    | 17%                                    | 3%          |
| 5    | 85             | 79%                                                    | 18%                                    | 3%          |
| 6    | 68             | 76%                                                    | 20%                                    | 4%          |
| 7    | 49             | 73%                                                    | 23%                                    | 4%          |
| 8    | 42             | 70%                                                    | 26%                                    | 4%          |
| 9    | 26             | 64%                                                    | 32%                                    | 4%          |
| 10   | 17             | 54%                                                    | 42%                                    | 4%          |

1008 ATA = atrial tachyarrhythmia; CIF = cumulative incidence function  
 1009  
 1010  
 1011  
 1012  
 1013  
 1014  
 1015  
 1016  
 1017  
 1018  
 1019  
 1020  
 1021  
 1022  
 1023  
 1024  
 1025  
 1026  
 1027  
 1028  
 1029  
 1030  
 1031  
 1032  
 1033  
 1034

1035 **Table E5.** Percentage of patients with paroxysmal vs non-paroxysmal AF estimated to be in each  
 1036 state at each year after stand-alone CMP-IV. Patients were assumed to be in one of three distinct  
 1037 states: alive and free from ATAs recurrence (composite endpoint), alive and having experienced  
 1038 first ATAs recurrence (CIF), or dead before ATAs recurrence (CIF).  
 1039

| Year | Paroxysmal AF (n = 60) |                                                        |                                        |             | Non-Paroxysmal AF (n = 176) |                                                        |                                        |             |
|------|------------------------|--------------------------------------------------------|----------------------------------------|-------------|-----------------------------|--------------------------------------------------------|----------------------------------------|-------------|
|      | Number at Risk         | Alive and free of ATAs recurrence (composite endpoint) | First Documented ATAs recurrence (CIF) | Death (CIF) | Number at Risk              | Alive and free of ATAs recurrence (composite endpoint) | First Documented ATAs recurrence (CIF) | Death (CIF) |
| 1    | 52                     | 93%                                                    | 7%                                     | 0%          | 135                         | 88%                                                    | 11%                                    | 1%          |
| 2    | 42                     | 88%                                                    | 12%                                    | 0%          | 118                         | 85%                                                    | 14%                                    | 1%          |
| 3    | 37                     | 88%                                                    | 12%                                    | 0%          | 87                          | 80%                                                    | 18%                                    | 2%          |
| 4    | 29                     | 85%                                                    | 12%                                    | 3%          | 70                          | 78%                                                    | 19%                                    | 3%          |
| 5    | 23                     | 83%                                                    | 14%                                    | 3%          | 62                          | 78%                                                    | 19%                                    | 3%          |
| 6    | 18                     | 82%                                                    | 14%                                    | 4%          | 50                          | 74%                                                    | 21%                                    | 5%          |
| 7    | 15                     | 77%                                                    | 18%                                    | 5%          | 34                          | 72%                                                    | 23%                                    | 5%          |
| 8    | 13                     | 77%                                                    | 18%                                    | 5%          | 29                          | 68%                                                    | 27%                                    | 5%          |
| 9    | 7                      | 77%                                                    | 18%                                    | 5%          | 19                          | 60%                                                    | 35%                                    | 5%          |
| 10   | 5                      | 66%                                                    | 29%                                    | 5%          | 12                          | 50%                                                    | 45%                                    | 5%          |

1040 AF = atrial fibrillation; ATA = atrial tachyarrhythmia; CIF = cumulative incidence function

1041  
 1042  
 1043  
 1044  
 1045  
 1046  
 1047  
 1048  
 1049  
 1050  
 1051  
 1052  
 1053  
 1054  
 1055  
 1056  
 1057  
 1058  
 1059  
 1060  
 1061  
 1062  
 1063

1064 **Table E6.** Percentage of patients estimated to be in each state at each year after stand-alone  
 1065 CMP-IV via sternotomy vs right mini-thoracotomy. Patients were assumed to be in one of three  
 1066 distinct states: alive and free from ATAs recurrence (composite endpoint), alive and having  
 1067 experienced first ATAs recurrence (CIF), or dead before ATAs recurrence (CIF).  
 1068

| Year | Sternotomy (n = 116) |                                                        |                                        |             | Right Mini-Thoracotomy (n = 120) |                                                        |                                        |             |
|------|----------------------|--------------------------------------------------------|----------------------------------------|-------------|----------------------------------|--------------------------------------------------------|----------------------------------------|-------------|
|      | Number at Risk       | Alive and free of ATAs recurrence (composite endpoint) | First Documented ATAs recurrence (CIF) | Death (CIF) | Number at Risk                   | Alive and free of ATAs recurrence (composite endpoint) | First Documented ATAs recurrence (CIF) | Death (CIF) |
| 1    | 94                   | 88%                                                    | 11%                                    | 1%          | 93                               | 91%                                                    | 9%                                     | 0%          |
| 2    | 88                   | 86%                                                    | 13%                                    | 1%          | 72                               | 85%                                                    | 14%                                    | 1%          |
| 3    | 70                   | 82%                                                    | 16%                                    | 2%          | 54                               | 82%                                                    | 17%                                    | 1%          |
| 4    | 55                   | 78%                                                    | 17%                                    | 5%          | 44                               | 82%                                                    | 17%                                    | 1%          |
| 5    | 49                   | 78%                                                    | 17%                                    | 5%          | 36                               | 80%                                                    | 19%                                    | 1%          |
| 6    | 39                   | 75%                                                    | 19%                                    | 6%          | 29                               | 77%                                                    | 22%                                    | 1%          |
| 7    | 33                   | 73%                                                    | 21%                                    | 6%          | 16                               | 74%                                                    | 25%                                    | 1%          |
| 8    | 29                   | 71%                                                    | 23%                                    | 6%          | 13                               | 70%                                                    | 29%                                    | 1%          |
| 9    | 20                   | 62%                                                    | 32%                                    | 6%          | 6                                | 70%                                                    | 29%                                    | 1%          |
| 10   | 14                   | 56%                                                    | 38%                                    | 6%          | 3                                | 46%                                                    | 53%                                    | 1%          |

1069 ATA = atrial tachyarrhythmia; CIF = cumulative incidence function

1070  
 1071  
 1072  
 1073  
 1074  
 1075  
 1076  
 1077  
 1078  
 1079  
 1080  
 1081  
 1082  
 1083  
 1084  
 1085  
 1086  
 1087  
 1088  
 1089  
 1090  
 1091  
 1092

1093 **Table E7.** Patients available for follow-up during study period. Initial cohort was comprised of  
 1094 236 patients who underwent stand-alone Cox-Maze IV procedure for refractory atrial  
 1095 fibrillation. Patients available for follow-up include all patients available at time of data  
 1096 collection (regardless of recurrence status) for each discrete timepoint. The number of deceased  
 1097 patients refers to the cumulative mortality at each timepoint. Patients not available for follow-up  
 1098 and not known to be deceased are displayed as censored.

| Year Follow-Up | Total Patients | Patients Available | Deceased Patients | Censored Patients |
|----------------|----------------|--------------------|-------------------|-------------------|
| 1              | 227            | 191                | 2                 | 34                |
| 2              | 201            | 163                | 6                 | 32                |
| 3              | 164            | 131                | 7                 | 26                |
| 4              | 140            | 104                | 9                 | 27                |
| 5              | 129            | 91                 | 9                 | 29                |
| 6              | 98             | 68                 | 11                | 19                |
| 7              | 84             | 57                 | 11                | 16                |
| 8              | 70             | 42                 | 12                | 16                |
| 9              | 65             | 33                 | 14                | 18                |
| 10             | 60             | 33                 | 14                | 13                |

1099  
 1100  
 1101  
 1102  
 1103  
 1104  
 1105  
 1106  
 1107  
 1108  
 1109  
 1110  
 1111  
 1112  
 1113  
 1114  
 1115  
 1116  
 1117  
 1118  
 1119  
 1120  
 1121  
 1122  
 1123  
 1124  
 1125

1126 **Table E8.** Freedom from tachyarrhythmias recurrence following stand-alone Cox-Maze IV  
 1127 procedure derived from rhythm data collected by all monitoring modalities compared to those  
 1128 only collected by prolonged monitoring. Freedom from tachyarrhythmias recurrence compared  
 1129 up to 10-year follow-up.

| Year | Freedom from ATAs                              |                                                |                |
|------|------------------------------------------------|------------------------------------------------|----------------|
|      | Rhythm Analysis from All Monitoring Modalities | Rhythm Analysis from Only Prolonged Monitoring | <i>P value</i> |
| 1    | 94% (187/199)                                  | 94% (142/151)                                  | 0.978          |
| 2    | 91% (148/163)                                  | 90% (95/105)                                   | 0.930          |
| 3    | 95% (124/131)                                  | 97% (77/79)                                    | 0.330          |
| 4    | 95% (99/104)                                   | 95% (63/66)                                    | 0.937          |
| 5    | 89% (81/91)                                    | 88% (46/52)                                    | 0.920          |
| 6    | 91% (62/68)                                    | 92% (35/38)                                    | 0.709          |
| 7    | 86% (49/57)                                    | 79% (22/28)                                    | 0.388          |
| 8    | 76% (32/42)                                    | 65% (13/20)                                    | 0.356          |
| 9    | 76% (25/33)                                    | 68% (13/19)                                    | 0.566          |
| 10   | 79% (26/33)                                    | 75% (12/16)                                    | 0.766          |

1130
